# Supplementary material for: Sugar transporter Slc37a2 regulates bone metabolism in mice via a tubular lysosomal network in osteoclasts
Source: PubMed Central journal article supplement (PMC9945426; doi:10.1038/s41467-023-36484-2), 2023-02-21
Supplement: 41467_2023_36484_MOESM1_ESM.pdf [file 41467_2023_36484_MOESM1_ESM.pdf]

## **SUPPLEMENTARY INFORMATION**

### **Sugar transporter Slc37a2 regulates bone metabolism in mice via a tubular lysosomal network in osteoclasts**

Ng, Ribet, Guo et al.

**Supplementary Table 1. Details of commercial antibodies used in the Methods section.**  
Dilutions used for immunofluorescence (IF) and immunoblotting (IB) are indicated.

| Antibody                                                             | Clone                             | Supplier                     | Catalogue #   | Dilution  |
|----------------------------------------------------------------------|-----------------------------------|------------------------------|---------------|-----------|
| <b>Primary Antibodies</b>                                            |                                   |                              |               |           |
| Mouse monoclonal anti-Actin                                          | JLA20, deposited by Lin, J.J.-C   | DSHB                         | JLA20         | IB 1:2000 |
| Rabbit monoclonal anti-Akt (pan)                                     | C67E7                             | Cell Signaling Technology    | 4691          | IB 1:1000 |
| Rabbit monoclonal anti-Phospho-Akt (Ser473)                          | D9E XP®,                          | Cell Signaling Technology    | 4060          | IB 1:1000 |
| Mouse monoclonal anti-ARL8A/B                                        | H-8                               | Santa Cruz                   | sc-398635     | IF 1:200  |
| Mouse monoclonal anti-Cathepsin K                                    | 182-12G5                          | Millipore                    | MAB3324       | IF 1:300  |
| Mouse monoclonal anti-Cathepsin K                                    | E-7                               | Santa Cruz                   | sc-48353      | IB 1:250  |
| Rabbit polyclonal anti-Cathepsin B                                   |                                   | Atlas Antibodies             | HPA018156     | IB 1:250  |
| Mouse monoclonal anti-CD63/LAMP3                                     | H5C6                              | DSHB                         | H5C6          | IF 1:100  |
| Rabbit polyclonal anti-Collagen I                                    |                                   | Abcam                        | ab34710       | IF 1:300  |
| Rabbit polyclonal anti t-ERK1/2                                      |                                   | Promega                      | V1141         | IB 1:1000 |
| Mouse monoclonal anti-p-ERK1/2                                       | E-4                               | Santa Cruz                   | sc-7383       | IB 1:500  |
| Mouse monoclonal anti-GM130                                          | 35/GM130                          | BD Transduction Laboratories | 610822        | IF 1:100  |
| Rabbit polyclonal anti-IkBa                                          | C-21                              | Santa Cruz                   | sc-371        | IB 1:1000 |
| Rat monoclonal anti-LAMP-2                                           | ABL-93, deposited by August, J.T  | DSHB                         | ABL-93        | IB 1:1000 |
| Rat monoclonal anti-LAMP-2                                           | GL2A7, deposited by Granger, B. L | DSHB                         | GL2A7         | IF 1:100  |
| Mouse monoclonal anti-NFATc1                                         | 7A6, deposited by Crabtree, G.R   | DSHB                         | 7A6           | IB 1:1000 |
| Rabbit polyclonal anti-MMP13                                         | ab39012                           | Abcam                        | ab39012       | IF 1:300  |
| Mouse monoclonal anti-PDI                                            | 1D3                               | ENZO Life Sciences           | ADI-SPA-891-F | IF 1:200  |
| Rabbit polyclonal anti-Rab1b                                         |                                   | Santa Cruz                   | sc-599        | IB 1:5000 |
| Mouse monoclonal anti-Rab5                                           | 621.3                             | Synaptic Systems             | 108 011       | IB 1:1000 |
| Rabbit monoclonal anti-Rab7                                          | D95F2                             | Cell Signaling Technology    | 9367          | IF 1:100  |
| Mouse monoclonal anti-Rab7                                           | E907E                             | Cell Signaling Technology    | 95746         | IB 1:2000 |
| Mouse monoclonal anti-Rab38                                          | A-8                               | Santa Cruz                   | sc-390176     | IB 1:200  |
| Rabbit monoclonal anti-RUNX2                                         | D1L7F                             | Cell Signaling Technology    | 12556         | IF 1:200  |
| Rabbit polyclonal anti-Syntaxin 16                                   |                                   | Synaptic Systems             | 110 163       | IB 1:300  |
| Mouse monoclonal anti-c-Src                                          | GD11                              | Millipore                    | 05-184        | IB 1:1000 |
| Mouse monoclonal V-ATPase D1                                         | 34-Z                              | Santa Cruz                   | sc-81887      | IB 1:1000 |
| Rabbit polyclonal anti-VDAC3                                         | H-40                              | Santa Cruz                   | sc-292328     | IB 1:500  |
| Rabbit polyclonal anti-VGluT-1                                       |                                   | Synaptic Systems             | 135 303       | IB 1:1000 |
| Mouse monoclonal anti-Vps35                                          | B-5                               | Santa Cruz                   | sc-374372     | IF 1:300  |
| <b>Secondary Antibodies</b>                                          |                                   |                              |               |           |
| Goat anti-mouse IgG (Fab specific)-<br>Peroxidase antibody           |                                   | Sigma-Aldrich                | A9917         | IB 1:5000 |
| Goat anti-rabbit IgG (whole molecule)-<br>Peroxidase antibody        |                                   | Sigma-Aldrich                | A0545         | IB 1:5000 |
| Alexa Fluor 488 goat anti-mouse IgG (H+L),<br>highly cross-adsorbed  |                                   | Thermo Fisher Scientific     | A-11029       | IF 1:500  |
| Alexa Fluor 568 goat anti-mouse IgG (H+L),<br>highly cross-adsorbed  |                                   | Thermo Fisher Scientific     | A-11031       | IF 1:500  |
| Alexa Fluor 647 goat anti-mouse IgG (H+L),<br>highly cross-adsorbed  |                                   | Thermo Fisher Scientific     | A-21236       | IF 1:500  |
| Alexa Fluor 488 goat anti-rabbit IgG (H+L),<br>highly cross-adsorbed |                                   | Thermo Fisher Scientific     | A-11034       | IF 1:500  |
| Alexa Fluor 568 goat anti-rabbit IgG (H+L),<br>highly cross-adsorbed |                                   | Thermo Fisher Scientific     | A-11036       | IF 1:500  |
| Alexa Fluor 647 goat anti-rabbit IgG (H+L),<br>highly cross-adsorbed |                                   | Thermo Fisher Scientific     | A-21245       | IF 1:500  |
| Alexa Fluor 555 donkey anti-rat, IgG (H+L),<br>highly cross-adsorbed |                                   | Thermo Fisher Scientific     | A-48270       | IF 1:500  |

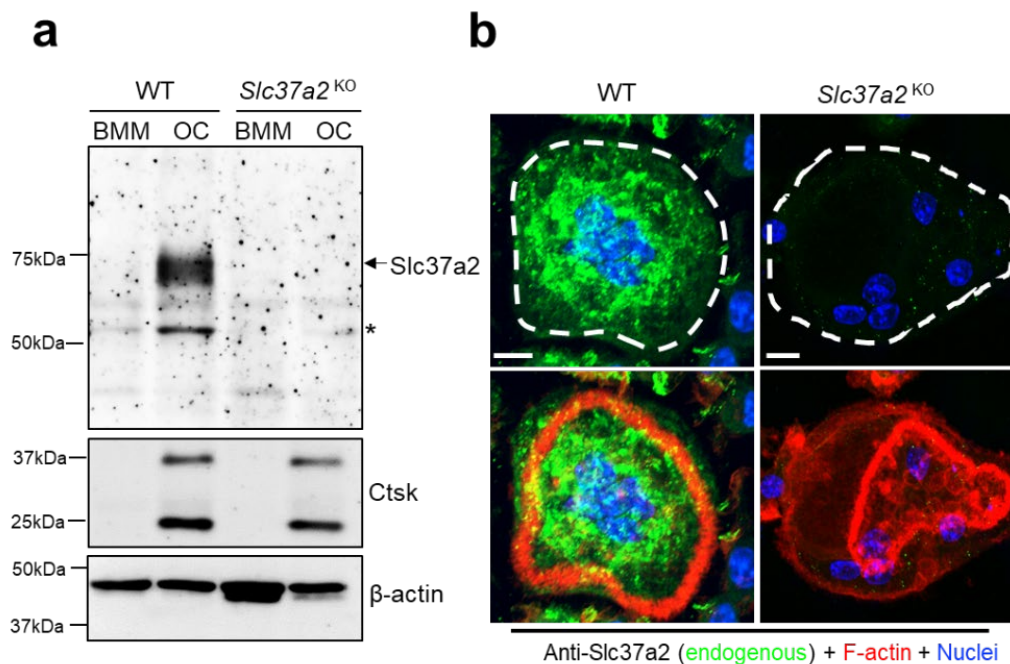

**Supplementary Figure 1. Specificity of custom-made antibody against *Slc37a2*.** **a** Western blot preparations of WT and *Slc37a2*<sup>KO</sup> bone marrow monocytes (BMM) and osteoclasts (OC) to confirm for specificity of a custom-made rabbit anti-Slc37a2 antibody directed against the cytoplasmic facing intracellular loop (against the peptide sequence CTPPRHHDDPEKEQ). A major band corresponding to the predicted size of glycosylated Slc37a2 is indicated by the black arrow and a minor species of unglycosylated Slc37a2 is indicated by the asterisk (\*). Little to no Slc37a2 signal was detected in WT BMMs. The signal was lost in *Slc37a2*<sup>KO</sup> derived BMMs and OCs. Cathepsin K (Ctsk) was used as a marker of OC differentiation and β-actin served as a loading control. 30μg of post-nuclear lysate were loaded per lane for each sample ( $n = 3$ ). Source unprocessed blots are available in Source data. **(b)** Immunofluorescence staining of WT and *Slc37a2*<sup>KO</sup> OCs to validate the specificity of the Slc37a2 antibody ( $n = 3$ ). Strong Slc37a2 signal (green) is detectable within rhodamide-phalloidin labelled F-actin rings (red) of WT bone-resorbing osteoclasts but is absent within F-actin rings of *Slc37a2*<sup>KO</sup> OCs. Nuclei (blue) were visualized with Hoechst 33342. Scale bar: 10 μm.

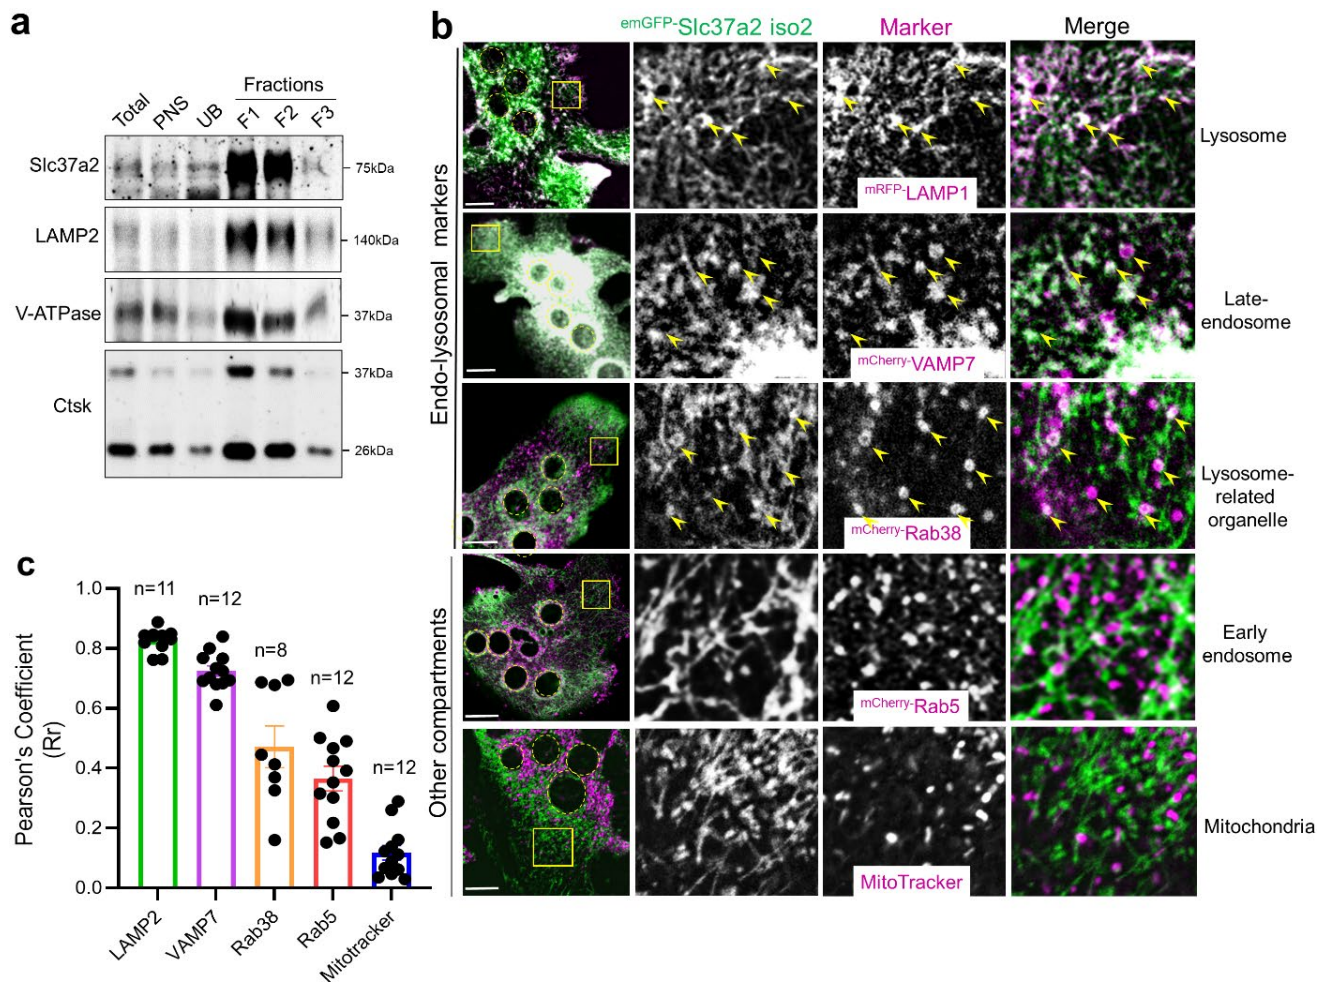

**Supplementary Figure 2. Slc37a2<sup>+</sup> tubular SLs colocalize with endolysosomal markers in living osteoclasts, Related to Fig. 3. (a)** Slc37a2 co-enriches with SLs. 5  $\mu$ g of proteins of indicated fractions collected during the isolation of enriched SLs was analyzed by SDS-PAGE and immunoblotting for Slc37a2 and SL markers LAMP2, V-ATPase and Ctsk. **(b)** Representative confocal images of live BMM-derived mouse osteoclasts on glass expressing  $emGFP$ -Slc37a2 isoform 2 together with indicated organelle markers. Arrows denote co-labeled organelles in magnified enlargements. Bar, 10  $\mu$ m. **(c)** Colocalization analyses as determined by Pearson's correlation coefficient (Rr) ( $n=$  8-12 cells per group). Mean  $\pm$  SD. Source data are provided as a Source Data file. See also Supplementary Movie 1 & 2.

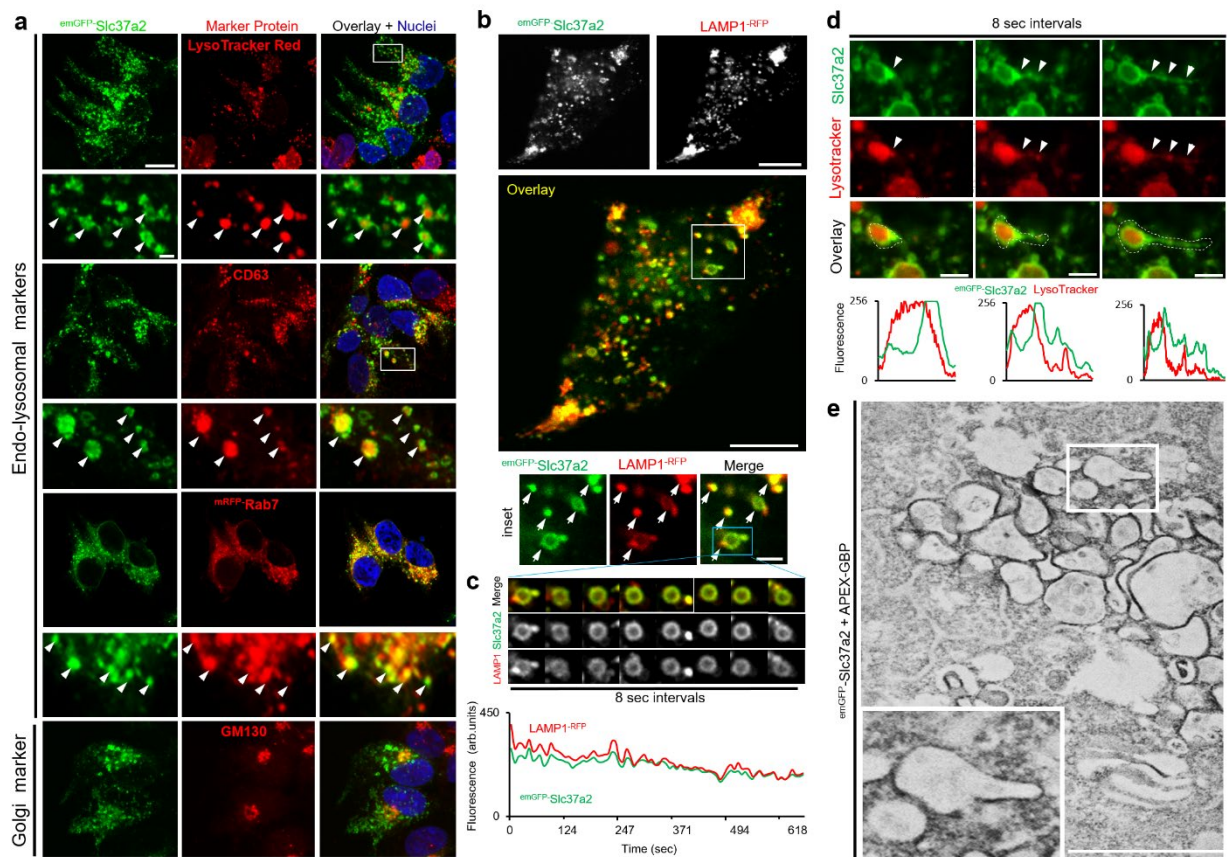

**Supplemental Figure 3.  $em^{GFP}$ -Slc37a2 localizes to late-endosomes/lysosomes in non-osteoclastic cell lines. Related to Fig. 3.** (a) Representative confocal images of HEK293 cells expressing  $em^{GFP}$ -Slc37a2 with indicated organelle markers. Bar, 10  $\mu$ m ( $n = 3$ ). (b-c) Live cell confocal imaging of a HEK293 cell co-expressing  $em^{GFP}$ -Slc37a2 with LAMP1<sup>-RFP</sup> (Bars, 10  $\mu$ m). Magnified region highlights colocalization of puncta (Bar, 1  $\mu$ m) and blue boxed region corresponds with time-lapse series shown for an individual endolysosome shown in (c) with associated intensity signal of fluorophores shown over time, intervals = 8 sec, ( $n = 2$ ). (d) High-resolution time-lapse series of an  $em^{GFP}$ -Slc37a2 labeled endolysosome co-labeled with LysoTracker Red. Corresponding line scans are shown below, intervals = 8 sec. Bar, 1  $\mu$ m ( $n = 3$ ). (e) Detection of  $em^{GFP}$ -Slc37a2 using a co-expressed APEX-tagged GFP-binding protein (APEX-GBP) in BHK cells results in prominent DAB reaction product labeling of late endosomes and lysosomes. Bar, 1  $\mu$ m ( $n = 2$ ). Source data are provided as a Source Data file.

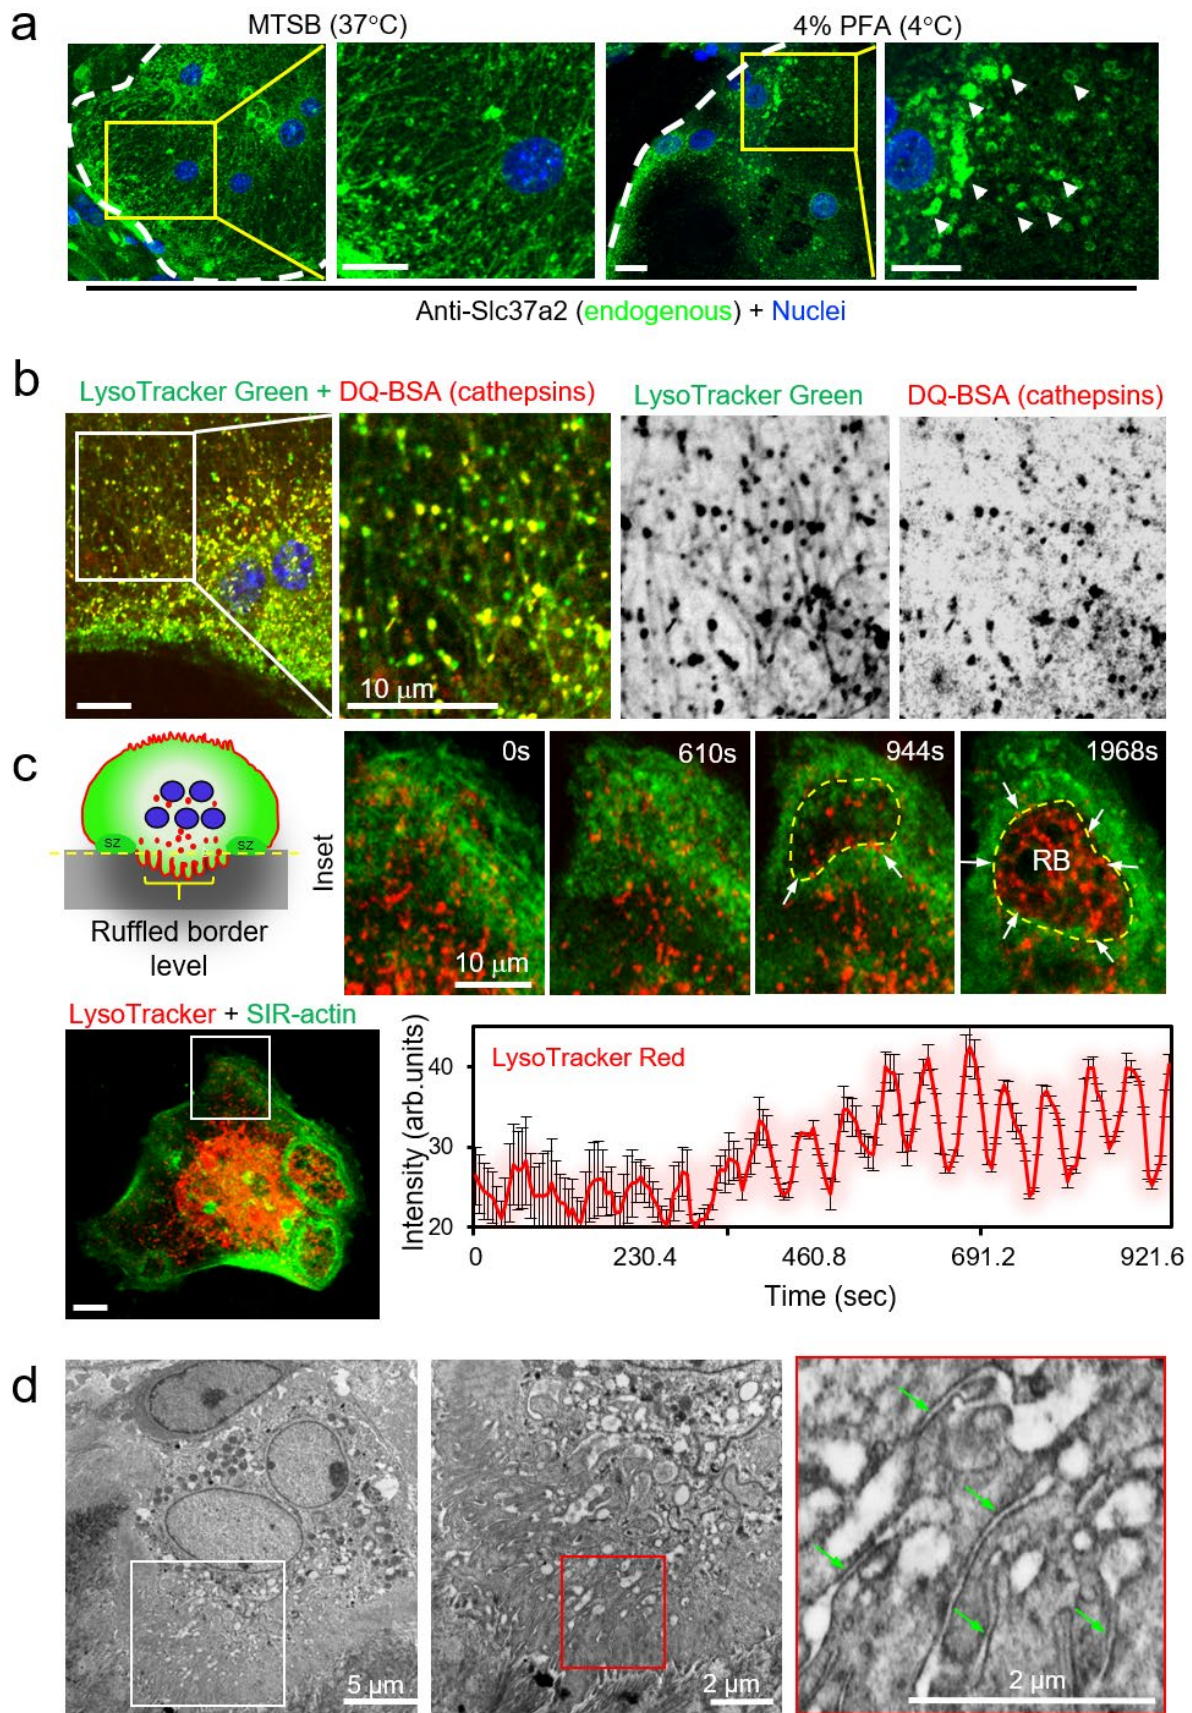

Supplementary Figure 4

**Supplementary Figure 4. Tubular SLs in naïve mouse osteoclasts. Related to Fig. 4. (a)** Representative immunofluorescence confocal images of endogenous Slc37a2 localization in mouse bone-marrow monocyte (BMM) derived osteoclasts fixed with microtubule stabilizing buffer (MTSB) at 37°C or cold fixed (4°C) with 4% paraformaldehyde (PFA). White dashed lines denotes cell boundary. Arrows in magnifications highlight large Slc37a2-puncta. Bar, 10 μm, (*n* = 3). **(b)** Confocal images of a live mouse BMM-derived osteoclast culture on glass and probed with LysoTracker Green and DQ-BSA (*n* = 4). **(c)** Confocal microscopy images of live mature primary osteoclast grown on glass pulsed with LysoTracker Red and SIR-actin with enlarged time-lapse inlay and fluorescent intensity (arbitrary units, arb. units) of LysoTracker Red signal during the indicated time-course. Data are presented as mean fluorescent intensity of LysoTracker Red within F-actin rings ±SD (*n* = 3 individual F-actin rings). Source data are provided as a Source Data file. Osteoclast cartoon depicted in panels c is adapted from <sup>1</sup>. **(d)** Electron micrograph of a representative mouse osteoclast lining trabecular bone within the primary spongiosa of 5-day-old mice. Magnified picture illustrate tubular SL-like structures (green arrows) in the vicinity of the nascent ruffled border (*n* = 2). See also Supplementary Movie 5.

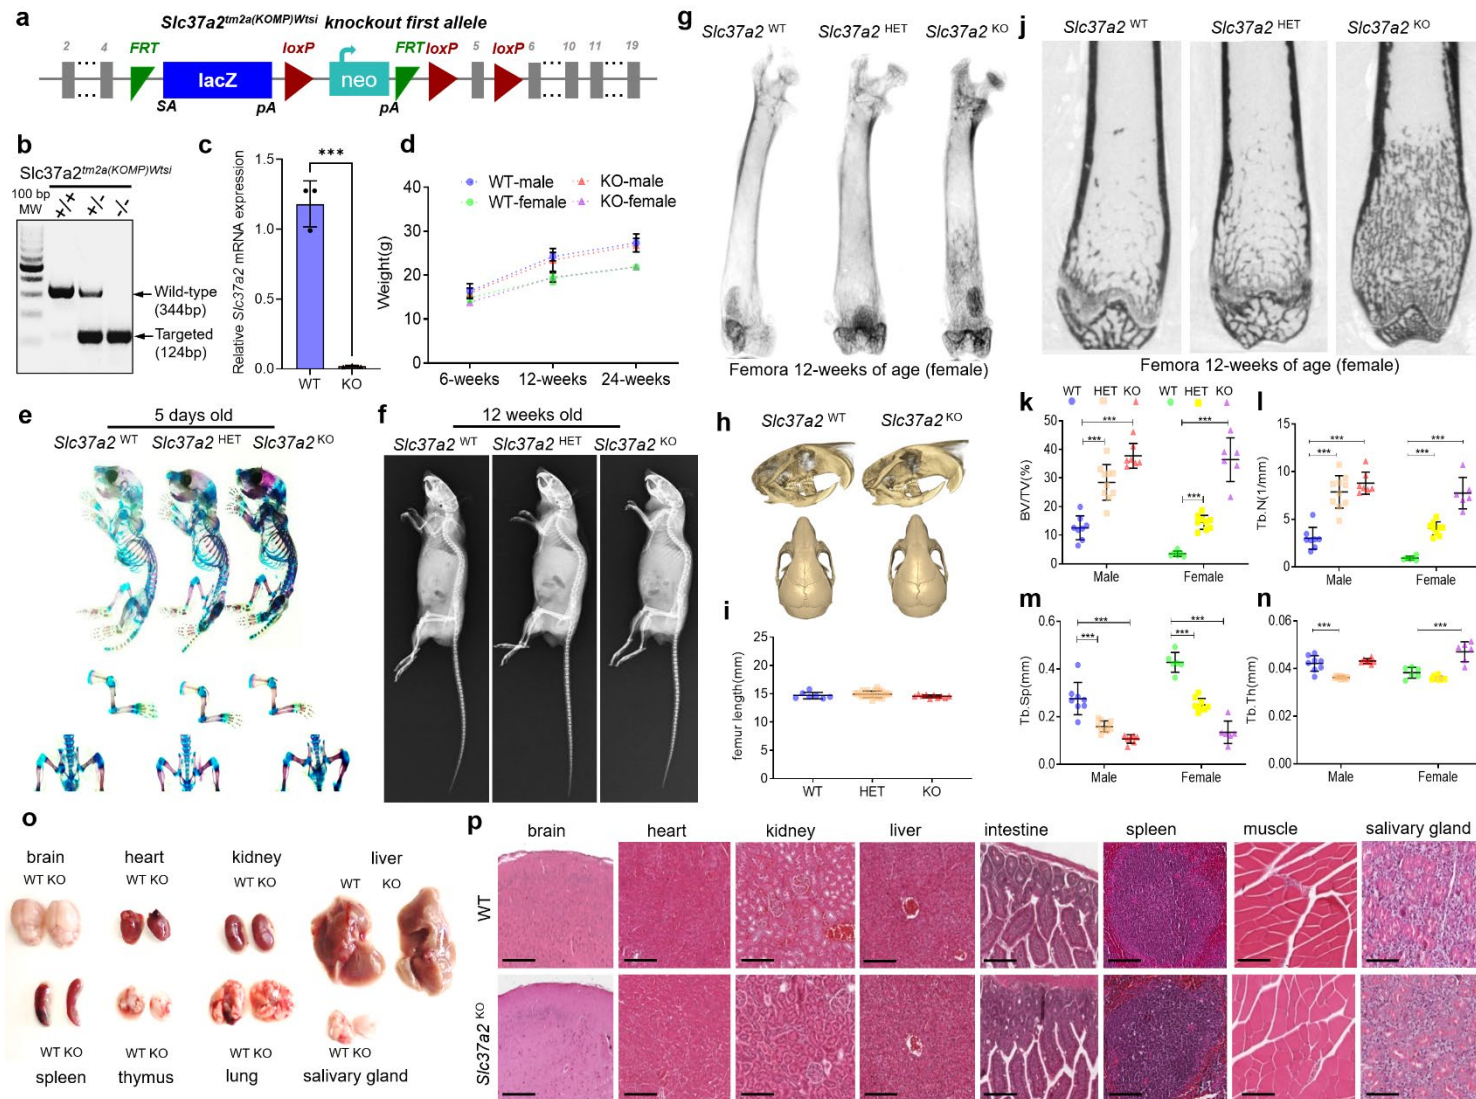

Supplementary Figure 5



**Supplementary Figure 5. Generation and phenotyping of *Slc37a2*<sup>KO</sup> mice. Related to Fig. 5.**

(a) Schematic of the *Slc37a2*<sup>tm2a(KOMP)Wtsi</sup> knockout first allele targeting strategy. (b) Genotyping confirming disruption of the *Slc37a2* gene locus. WT, wildtype (+/+); HET, heterozygous (-/+); KO, homozygous (-/-). (c) qPCR confirmation of *Slc37a2* mRNA depletion in femurs ( $n = 3$ ,  $P=0.0003$ ). (d) Body weight of age and sex matched WT and *Slc37a2*<sup>KO</sup> mice. Male mice (WT: 6-weeks  $n = 9$ , 12-weeks  $n = 10$ , 24-weeks  $n = 8$ ; *Slc37a2*<sup>KO</sup>: 6-weeks  $n = 6$ , 12-weeks  $n = 18$ , 24-weeks  $n = 8$ ) and female mice (WT: 6-weeks  $n = 7$ , 12-weeks  $n = 9$ , 24-weeks  $n = 6$ ; *Slc37a2*<sup>KO</sup>: 6-weeks  $n = 7$ , 12-weeks  $n = 9$ , 24-weeks  $n = 5$ ). (e) Five-day-old whole-mount skeletal preparations stained for Alcian blue (cartilage) and Alizarin red (bone). (f) Whole body mammography of 12-week old female *Slc37a2* WT, HET and KO mice. (g-h) Representative  $\mu$ CT reconstructed images of femurs (g), skulls (h) from 12-week-old female mice with genotypes indicated. (i) Quantification of femur length of 12-week-old-female *Slc37a2* WT ( $n = 7$ ), HET ( $n = 22$ ) and KO ( $n = 10$ ) mice. (j-n) Representative sagittal  $\mu$ CT section (j) and  $\mu$ CT analysis (k-n) of distal femurs of 12-wk-old male (WT:  $n = 8$ ; HET:  $n = 10$ ; KO:  $n = 7$ ) and female (WT:  $n = 6$ ; HET:  $n = 9$ ; KO:  $n = 6$ ) *Slc37a2* WT, HET and KO mice. (o) Macroscopic overview of organs from WT and *Slc37a2*<sup>KO</sup> mice. (p) Representative H&E staining of paraffin-embedded tissue sections of WT and *Slc37a2*<sup>KO</sup> mice. Original magnification:  $\times 100$ . Bars, 200  $\mu$ m. All data represent mean  $\pm$  SD. \*\*\*  $P < 0.001$  by two-tailed unpaired Student's t test (c, d) and by two-way ANOVA with Tukey's multiple comparison test (i, k-n). (k, male WT vs HET  $P < 0.0001$ ; WT vs KO  $P < 0.0001$ ; female WT vs HET  $P = 0.0003$ ; WT vs KO  $P < 0.0001$ ; l, male WT vs HET  $P < 0.0001$ ; WT vs KO  $P < 0.0001$ ; female WT vs HET  $P < 0.0001$ ; WT vs KO  $P < 0.0001$ ; m, male WT vs HET  $P < 0.0001$ ; WT vs KO  $P < 0.0001$ ; female WT vs HET  $P < 0.0001$ ; WT vs KO  $P < 0.0001$ ; n, male WT vs HET  $P < 0.0001$ ; WT vs KO  $P < 0.0001$ ; female WT vs HET  $P < 0.0001$ ; WT vs KO  $P < 0.0001$  Source data are provided as a Source Data file.

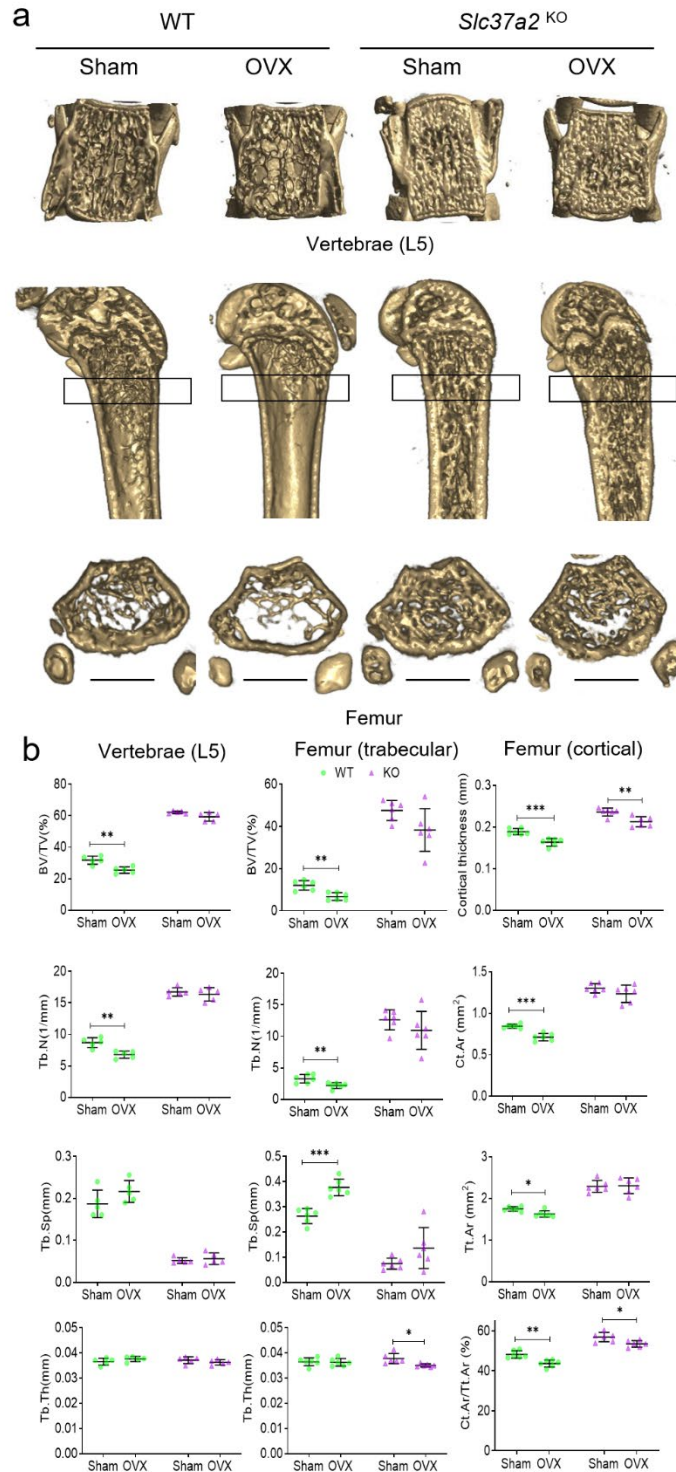

**Supplementary Figure 6. *Slc37a2* deletion attenuates bone loss caused by estrogen deficiency, Related to Fig. 5. (a)** Representative  $\mu$ CT images of vertebra (L5) and distal femurs and of sham operated or ovariectomized (OVX) WT and *Slc37a2*<sup>KO</sup> mice. **(b)**  $\mu$ CT analysis of the vertebra and femurs of sham operated or OVX WT and *Slc37a2*<sup>KO</sup> mice ( $n = 6$ ). All data are presented as mean  $\pm$  SD. \* $p < 0.05$ ; \*\* $p < 0.01$ ; \*\*\* $p < 0.001$ ; two-tailed unpaired Student's t-test. Vertebrae Bone Volume/Tissue Volume, BV/TV WT  $P=0.00297$ , Trabecular Number, Tb.N WT  $P=0.00257$ ; Femur (trabecular) BV/TV WT  $P=0.005$ , Tb.N WT  $P=0.0098$ , Trabecular Separation, WT Tb.S  $P<0.0001$ , Tb.Th *Slc37a2*<sup>KO</sup>  $P=0.01882$ ; Femur (cortical) Cortical thickness WT  $P=0.00040$ , *Slc37a2*<sup>KO</sup>  $P=0.00438$ , Cortical Area, Ct.Ar WT  $P=0.00023$ , Trabecular Area, Tt.Ar WT  $P=0.01252$ , Ct.Ar/Tt.Ar WT  $P=0.00133$ , *Slc37a2*<sup>KO</sup>  $P=0.01738$ . Source data are provided as a Source Data file.

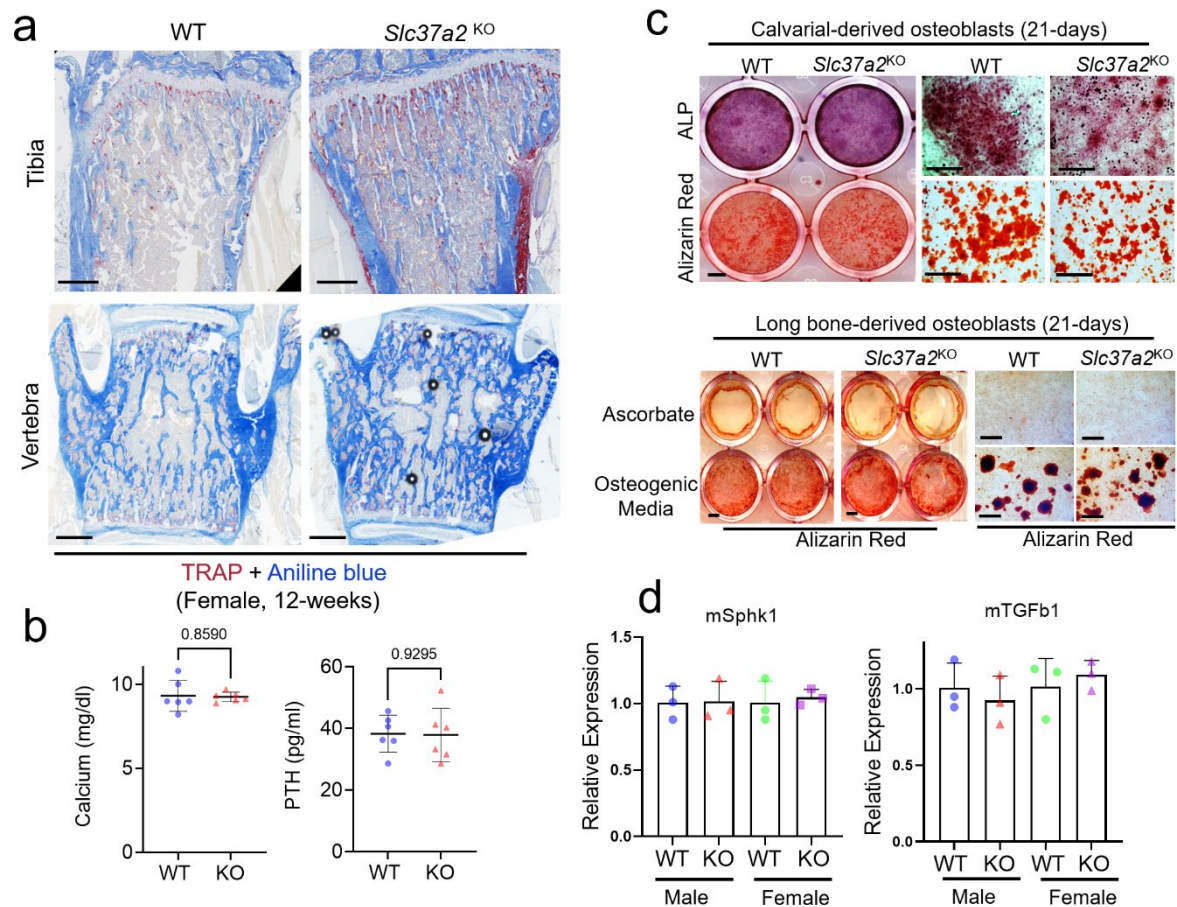

**Supplementary Figure 7.** (a) Representative histological images of Alcian blue staining of tibia and vertebra of 12-week-old female WT and *Slc37a2*<sup>KO</sup> mice. Bars, 1 mm. (b) Serum calcium and parathyroid hormone (PTH) levels in 12-week-old male WT and *Slc37a2*<sup>KO</sup> mice ( $n = 6$ , per genotype). Data are presented as means  $\pm$ SD. (c) Representative alkaline phosphatase (ALP) and alizarin red staining of WT and *Slc37a2*<sup>KO</sup> osteoblasts isolated from calvarial bone following culture in osteogenic media (50  $\mu$ g/ml L-ascorbic acid, 2 mM  $\beta$ -glycerophosphate,  $10^{-8}$  M dexamethasone) for 21-days and alizarin red staining of WT and *Slc37a2*<sup>KO</sup> of mesenchymal stem cell-derived osteoblasts isolated from long bones cultured *in vitro* in the absence or presence of osteogenic media for 21 days. Bars, whole well 2 mm, magnifications 500  $\mu$ m (d) qPCR expression of Sphk1 and TGF- $\beta$ 1 in mouse bone marrow monocyte-derived osteoclasts from male and female WT and *Slc37a2*<sup>KO</sup> mice ( $n = 3$ , per sex/genotype). Data are presented as means  $\pm$ SD.  $P$  values are derived by two-tailed unpaired Student's t-test. Source data are available in Source Data file.

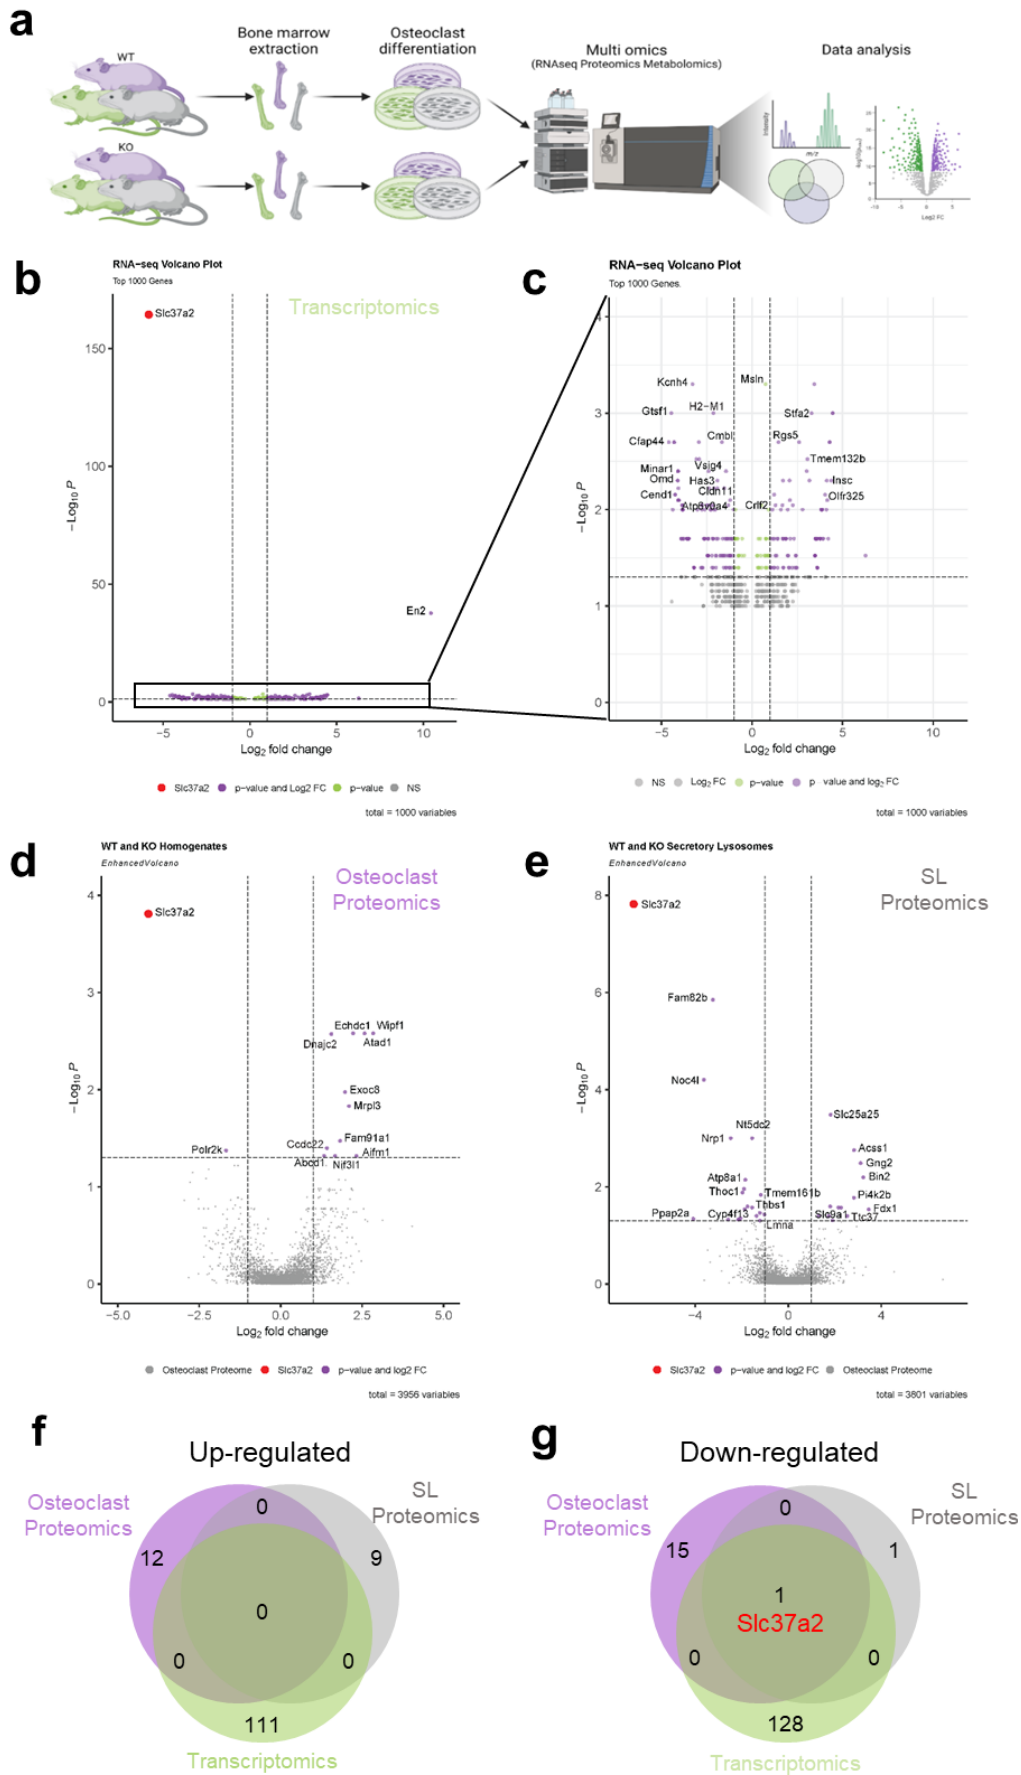

Supplementary Figure 8

**Supplementary Figure 8. Multi-omic analyses of wild-type and *Slc37a2*<sup>KO</sup> osteoclasts. Related to Fig. 9.** (a) Schematic of the sample acquisition and omic tools used to compose the osteoclast proteome, transcriptome and metabolome. Created with [BioRender.com](https://www.biorender.com). (b) Volcano plot summarizing the differences between the WT and *Slc37a2*<sup>KO</sup> osteoclast transcriptomes ( $n = 3$  biological replicates per genotype). Differentially expressed genes were defined by having an absolute number of Log<sub>2</sub>fold-change greater than 1.5 and Benjamini-Hochberg adjusted  $q$ -value  $< 0.05$ . The dashed lines represent thresholds used to identify differentially upregulated/downregulated genes. *Slc37a2* is depicted in red. (c) Magnification of the volcano plot in (b) summarizing the differences between the WT and *Slc37a2*<sup>KO</sup> osteoclast transcriptomes. (d) Volcano plot summarizing the differences between the WT and *Slc37a2*<sup>KO</sup> osteoclast cellular proteomes ( $n = 3$  biological replicates per genotype). Points indicate different proteins that display both magnitude fold-changes (FC, x axis) and high statistical significance ( $-\log_{10}$  of  $P$  values, y axis). Dashed horizontal line shows the  $P$  value cut-offs (adjusted  $P > 0.05$ , ANOVA, Benjamini-Hochberg adjusted) and the two vertical dashed lines indicate down (FC  $< 1.5$ )/ up (FC  $> 1.5$ ) regulated proteins. (e) Volcano plot summarizing the differences between the WT and *Slc37a2*<sup>KO</sup> osteoclast SL proteomes ( $n = 3$  biological replicates per genotype).  $-\log_{10}$  of the adjusted  $P$  value (ANOVA, Benjamini-Hochberg adjusted) of the ratio between homogenate and lysosome peptide abundance versus the normalised abundance ratio Log<sub>2</sub>FC of osteoclast whole cell homogenate and enriched secretory lysosomes. (f) Venn diagram summarizing the intersection between up-regulated hits ( $P > 0.05$ , FC  $> 1.5$ ) from the transcriptomic and proteomic analyses; (g) Venn diagram summarizing the intersection between down-regulated hits ( $P > 0.05$ , FC  $< 1.5$ ) from the transcriptomic and proteomic analyses.

## Supplementary References

- 1 Ng, P. Y., Brigitte Patricia Ribet, A. & Pavlos, N. J. Membrane trafficking in osteoclasts and implications for osteoporosis. *Biochemical Society transactions*, doi:10.1042/BST20180445 (2019).

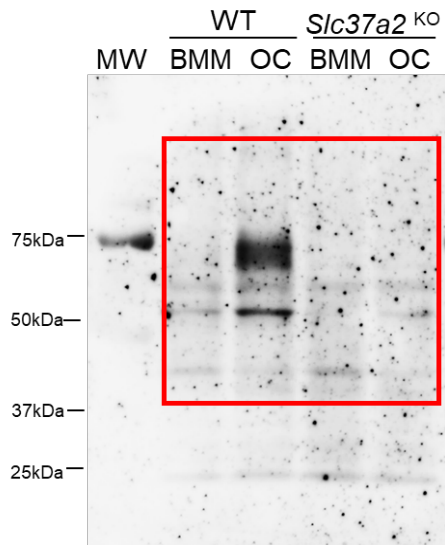

WB: anti-Slc37a2

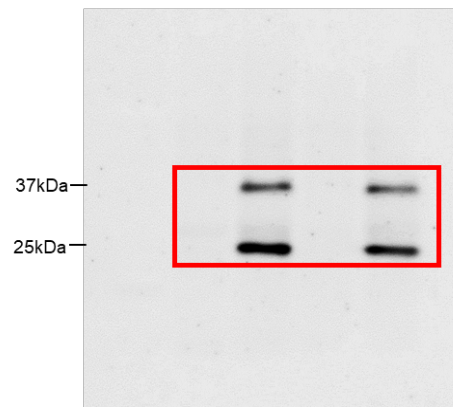

WB: anti-Ctsk

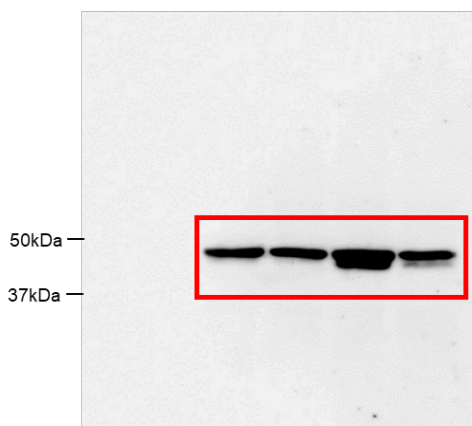

WB: anti-β-actin

Supplementary Fig. 1a

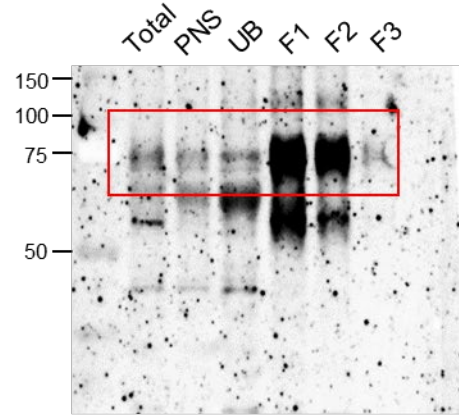

WB: anti-Slc37a2

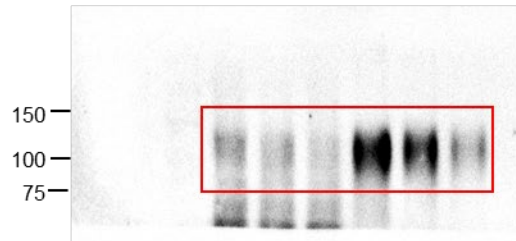

WB: anti-LAMP2

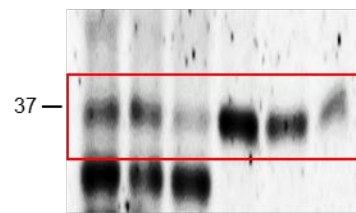

V-ATPase

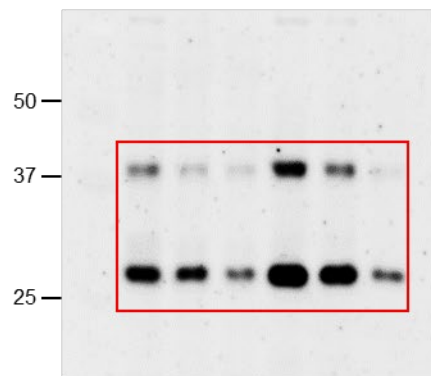

Ctsk

Supplementary Fig. 2a

Uncropped blots for Supplementary Figure 1a and Supplementary Figure 2a
